# Supplementary material for: Characteristic of persistent human papillomavirus infection in women worldwide: a meta–analysis
Source: PeerJ. 2023 Nov 14;11:e16247. doi: 10.7717/peerj.16247 (PMC10655709; doi:10.7717/peerj.16247)
Supplement: Supplemental Information 1 [file peerj-11-16247-s001.xlsx]

## Sheet: HPV genotype
影响因子	Year	Author	Continent	HPV genotypes（NO. persistent infections/NO.positive ）
				HPV52		HPV58		HPV16		HPV18		HPV51		HPV68		HPV39		HPV33		HPV31		HPV66		HPV45		HPV59		HPV56		HPV82		HPV11		HPV53		HPV35		HPV6
	2021	Xu Y.L.	Asia	131	485	67	201	75	197	24	89	44	180	24	88	26	260	16	57	7	31	14	123			9	13	16	37	10	64							19	107
	2020	Jin R.	Asia	20	75	28	64	40	100	30	70	3	30	1	20	5	38	5	36	5	41	4	48	5	33	5	38	4	32	2	15					6	42
	2019	Wei D.L.	Asia	34	146	56	287	136	722	7	79	6	32	8	30	13	77	15	71	8	78	8	38	5	12	7	25	5	17					10	70	8	12
	2018	Zhong X.M.	Asia	21	100	20	52	10	53	14	35	5	25			2	11	2	11	5	16	3	9	0	8			2	14			0
	2018	Xu S.S.	Asia	362	1050	361	812	283	1033	133	577	173	552	64	255	177	727	81	212	83	283					117	469	148	310							65	191
	2018	Shen L.J.	Asia	122	213	73	132	45	105	29	56	8	21	18	51	15	40	42	81	13	27			2	5	5	12	8	23							4	10
	2014	Wang X.Q.	Asia	2	27	15	83	48	123	19	51	0	16					12	60	2	30			1	17			2	12
	2021	Hu M.M.	Asia	12	106	29	100	85	141	22	88					1	53	3	49	3	53			3	43	3	53
	2015	Zhang Q.	Asia	31	117	36	159	79	348	10	58	0	14	5	33	5	32	8	43	14	59			1	8	2	14	3	24
	2020	Long X.	Asia	170	687	76	304	124	534	37	195	15	146	13	134	24	163	31	174	28	129			8	41	18	132
	2021	Li M.	Asia	1350	3189	727	1782	749	2846	256	908	170	699	254	785	271	862	207	697	148	480	51	196	35	198	72	348	53	184			50	217	155	392	13	62	52	280
	2018	Ingabire C.	Asia	3	15	0	6	2	10	0	5	0	11	0	7	1	10	1	3	0	1	0	15	1	4	0	1	1	12					1	15	1	5	0	3
	2020	Liu J.	Asia	9	26	12	30	18	72	4	22	4	25	4	19	5	22	3	18	2	14	2	10	0	5	0	2	2	10					6	15	0	1
	2010	Nielsen A.	Europe	37	224	25	101	95	317	29	149	34	222	11	123	17	169	29	160	64	271	12	152	23	110	11	76	19	156					7	97	10	65
	2013	Sammarco M. L.	Europe	4	11	3	7	3	16	1	3	1	3			4	5	0	1	7	10	2	7	1	3	2	5	1	5					2	10	1	1
	2016	Stensen S.	Europe	138	613	33	175	270	743	76	349	72	488	31	335	57	351	66	244	166	575			46	307	11	159	38	287							20	128
	2017	Li N.	Asia	2	13	7	15	7	17	5	8	1	2	0	4	1	7	1	4			0	1	0	2	2	2	1	1	0	1	0	0	0	1			0	6
	2013	Miranda P. M.	South America			0	1	22	34	3	6							2	2	0	2	1	1	0	1	1	1							1	2			2	6
	2005	Cuschieri K. S.	Europe	1	6	2	6	16	33	2	10	0	12	0	2	0	1	3	5	1	10			1	7	4	7
	2008	Sycuro L. K.	North America	4	26	0	12	5	59	1	23	0	30	0	3	2	31	0	12	2	20			0	9	0	20
	2011	Schmeink C. E.	Europe	12	34			37	68	13	26	11	44	7	19	10	25	5	10	21	37			6	10	2	9
	2020	Muwonge R.	Asia	12	48	8	67	21	89	10	45	2	31	10	62	5	36	4	36	6	78			3	23	5	43
	2010	Ye J.	Asia	96	155	59	106	66	123					13	52
	2014	Soto-De León S. C.	South America			0	100	53	156									5	14	17	81			27	95
	2008	Lai C. H.	Asia	36	52	15	41	3	7	24	61	4	10	5	11	18	27	6	13	2	4			6	13	7	12
	2003	Richardson H.	North America					38	62	10	25	16	45			8	24			13	21
	2007	Bulkmans N. W. J.	Europe	14	42	12	55	76	149	21	47	6	40	2	14	5	45	14	28	40	80			18	58	3	18
	2019	Krings A.	Africa	3	23	0	24	1	1	0	27	1	13	1	21	1	6	0	7	0	7			0	1	0	1

## Sheet: Overall
Author	Year	Number	Case	p
Xu Y.L.	2021	488	132	0.27
Wei D.L.	2019	1586	292	0.18
Zhong X.M.	2018	340	84	0.25
Xu S.S.	2018	1633	347	0.21
Shen L.J.	2018	704	378	0.54
Wang X.Q.	2014	285	74	0.26
Hu M.M.	2021	585	163	0.28
Zhang Q.	2015	760	172	0.23
Long X.	2020	2784	564	0.2
Li M.	2021	10133	4334	0.43
Ingabire C.	2017	105	13	0.12
Liu J.	2020	565	125	0.22
Nielsen A.	2010	1166	314	0.27
Sammarco M. L.	2013	55	27	0.49
Stensen S.	2016	2874	901	0.31
Li N.	2017	85	29	0.34
Miranda P. M.	2013	89	53	0.6
Cuschieri K. S.	2005	126	29	0.23
Sycuro L. K.	2008	147	24	0.16
Ye J.	2010	400	218	0.55
Lai C. H.	2008	412	140	0.34
Richardson H.	2003	124	69	0.56
Bulkmans N. W. J.	2007	620	217	0.35
Krings A.	2019	104	7	0.07

## Sheet: Subgroup analysis
Author	Year	Number	Case	p	Sample Number	Sample Source	Year	Follow-up_Time	Quality Score	Area
Xu Y.L.	2021	488	132	0.27	≤500	HPV	3	1-2	4-7	Asia
Wei D.L.	2019	1586	292	0.18	>500	HR-HPV	2	<1	4-7	Asia
Zhong X.M.	2018	340	84	0.25	≤500	HPV	2	<1	4-7	Asia
Xu S.S.	2018	1633	347	0.21	>500	HR-HPV	2	>2	8-10	Asia
Shen L.J.	2018	704	378	0.54	>500	HR-HPV	2	<1	8-10	Asia
Wang X.Q.	2014	285	74	0.26	≤500	HR-HPV	2	<1	4-7	Asia
Hu M.M.	2021	585	163	0.28	>500	HR-HPV	3	<1	4-7	Asia
Zhang Q.	2015	760	172	0.23	>500	HR-HPV	2	>2	4-7	Asia
Long X.	2020	2784	564	0.2	>500	HR-HPV	3	1-2	4-7	Asia
Li M.	2021	10133	4334	0.43	>500	HPV	3	1-2	4-7	Asia
Ingabire C.	2017	105	13	0.12	≤500	HPV	2	1-2	8-10	Asia
Liu J.	2020	565	125	0.22	>500	HPV	3	<1	8-10	Asia
Nielsen A.	2010	1166	314	0.27	>500	HR-HPV	1	1-2	4-7	Europe
Sammarco M. L.	2013	55	27	0.49	≤500	HR-HPV	2	1-2	4-7	Europe
Stensen S.	2016	2874	901	0.31	>500	HR-HPV	2	>2	8-10	Europe
Li N.	2017	85	29	0.34	≤500	HPV	2	<1	8-10	Asia
Miranda P. M.	2013	89	53	0.6	≤500	HR-HPV	2	1-2	4-7	Other
Cuschieri K. S.	2005	126	29	0.23	≤500	HR-HPV	1	>2	4-7	Europe
Sycuro L. K.	2008	147	24	0.16	≤500	HPV	1	>2	4-7	Other
Ye J.	2010	400	218	0.55	≤500	HR-HPV	1	<1	8-10	Asia
Lai C. H.	2008	412	140	0.34	≤500	HPV	1	1-2	4-7	Asia
Richardson H.	2003	124	69	0.56	≤500	HR-HPV	1	<1	4-7	Other
Bulkmans N. W. J.	2007	620	217	0.35	>500	HR-HPV	1	1-2	4-7	Europe
Krings A.	2019	104	7	0.07	≤500	HR-HPV	2	>2	4-7	Other
Subgroups	No of Studies	Persistent infection rate（%）	95%CI (%)		P	Persistent infection rate（%）	CL1	CL2
Area					0.743
Asia	15	28.38	22.94 ~ 34.54			28.38	22.94	34.54
Europe	5	31.54	26.26 ~ 37.34			31.54	26.26	37.34
Other	4	28.9	10.43 ~ 58.67			28.9	10.43	58.67
Year of publication					0.547
≤2010	7	33.94	24.39 ~ 45.00			33.94	24.39	45
2011-2019	12	27.58	19.52 ~ 37.41			27.58	19.52	37.41
≥2020	5	27.5	21.27 ~ 34.76			27.5	21.27	34.76
Sample number					0.774
≤500	11	30.07	23.01 ~ 34.57			30.07	23.01	34.57
>500	13	28.43	21.39 ~ 40.46			28.43	21.39	40.46
Quality score					0.694
4-7	17	28.61	22.67 ~ 35.40			28.61	22.67	35.4
8-10	7	31.21	21.05 ~ 43.57			31.21	21.05	43.57
Follow-up time(year)					0.022
<1	9	33.87	25.19 ~43.80			33.87	25.19	43.8
1-2	9	32.51	24.23 ~ 42.05			32.51	24.23	42.05
>2	6	19.87	14.28 ~ 26.95			19.87	14.28	26.95
Sample source					0.322
HR-HPV	16	31.23	23.97 ~ 39.55			31.23	23.97	39.55
HPV	8	26.08	20.04 ~ 33.17			26.08	20.04	33.17

## Sheet: Age
<30			30-39			40-49			>50
Author	Number	Case	Author	Number	Case	Author	Number	Case	Author	Number	Case
Ann Nielsen	1166	314	P. M. Miranda	20	13	P. M. Miranda	25	14	P. M. Miranda	16	9
Signe Stensen	1557	518	Signe Stensen	866	268	Signe Stensen	280	68	Signe Stensen	171	45
Zhang Q.	122	22	Zhang Q.	292	59	Cecile Ingabire	37	2	Cecile Ingabire	42	9
Amrei Krings	25	2	Amrei Krings	30	3	Zhang Q.	275	58	Zhang Q.	71	33
						Amrei Krings	26	1	Amrei Krings	21	1

## Sheet: Multiple and Single
		NO.positive		NO.persistent infections
Author	NO.total persistent infections	multiple	single	multiple	single
Ni Li-2017	29	10	75	6	23
P. M. Miranda-2013	53	9	80	7	46
Zhang Q.-2015	172	144	616	21	151
